## Title page

Dual Value System and its assessment scheme for understanding and valuing ecosystem services

YANG Haile <sup>a, b, 1#</sup>, CHEN Jiakuan <sup>a, b, c, \*</sup>

<sup>a</sup> Institute of Biodiversity Science, Fudan University, Shanghai 200438, China

<sup>b</sup> Department of Ecology and Evolutionary Biology, School of Life Sciences, Fudan University, Shanghai 200438, China

<sup>c</sup> Centre for Watershed Ecology, Institute of Life Science, Nanchang University, Nanchang 330031, China

<sup>1#</sup> Present Address: Key Laboratory of Freshwater Biodiversity Conservation, Ministry of Agriculture of China, Yangtze River Fisheries Research Institute, Chinese Academy of Fishery Sciences, 8 First Wudayuan Road, Wuhan 430223, Hubei Province, PR China

E-mail: [haileyang10@fudan.edu.cn](mailto:haileyang10@fudan.edu.cn), [haileyang18@yfi.ac.cn](mailto:haileyang18@yfi.ac.cn) (YANG Haile); [jkchen@fudan.edu.cn](mailto:jkchen@fudan.edu.cn) (CHEN Jiakuan)

\* Corresponding author

E-mail: [jkchen@fudan.edu.cn](mailto:jkchen@fudan.edu.cn) (CHEN Jiakuan)

## 1 **Abstract**

2 Valuing ecosystem services (ES) is helpful for effective ES management. However, there are  
3 many limitations in traditional ES valuation approaches, including theoretical challenges and  
4 practical difficulties. To overcome these limitations, we proposed a dual value system (DVS). And  
5 then, we presented a case study of valuing the water provision in Zhujiang River Basin (Pearl  
6 River Basin) based on DVS. DVS follows the axioms that (1) human life would end if we lose any  
7 of vital ES which is indispensable to human being's survival (such as oxygen, freshwater) and (2)  
8 ES cannot provide any value to people without human activities. Correspondingly, DVS includes  
9 two types of value: the output support value (OSV) of a vital ES refers to the total value produced  
10 by human being's economic and social activities (TVPH) supported by the ES consumption; the  
11 optional capacity value (OCV) of a vital ES refers to the optional capacity of supporting TVPH  
12 provided by total ES volume. The OCV provided by a vital ES is calculated by using the product  
13 of multiplying the OSV (TVPH) by the freedom of choosing the consumption from the total  
14 volume of this ES, valued in non-monetary units. Based on DVS, the OSV and OCV of water  
15 provision in Zhujiang River Basin were analyzed in river basin scale and sub-basin scale, and the  
16 values variation of water provision from 2006 to 2015 was analyzed in sub-basin scale. And then,  
17 based on this case study, we discussed the new insights into ES provided by DVS. Results proved  
18 that DVS and its assessment scheme overcame the limitations on current ES valuation approaches  
19 and provided an innovative quantitative framework to understand and value ES which will help to  
20 make good decisions in ES management.

21

## 22 **Keywords**

23 Ecosystem services valuation; dual value system; output support value; optional capacity value;  
24 ecosystem services spatial subsidy; Pearl River Basin

25

---

ES: ecosystem service(s)

OSV: output support value

OCV: optional capacity value

DVS: dual value system

GDP: gross domestic product

TVPH: total value produced by human being's economic and social activities

PRWRC: Pearl River Water Resources Commission of the Ministry of Water Resources

## 26 **1. Introduction**

27 Ecosystems provide a range of services that are fundamentally important for human wellbeing,  
28 health, livelihoods, and survival (Costanza et al., 1997; Millennium Ecosystem Assessment, 2005;  
29 TEEB Synthesis, 2010). To unravel the complex socio-ecological relationships and explicate how  
30 human decisions would affect ecosystem services (ES), the values of ES are used to express these  
31 changes which allow for their incorporation in public decision-making processes (Farley and  
32 Costanza, 2010; Pascual et al., 2010; Costanza et al., 2017).

33

34 The valuation of ES could be monetary, non-monetary, or mixes of monetary and non-monetary  
35 (Figure 1). In monetary ES valuation studies, there are two approaches (Jiang, 2017): (1) unit  
36 value based approach (i.e. benefit transfer) (Costanza et al., 1997; de Groot et al., 2012; Costanza  
37 et al., 2014; Kubiszewski et al., 2017) and (2) primary data based approach (Ouyang et al., 1999;  
38 Guo et al., 2001; Dai et al., 2016) (Figure 1). In non-monetary ES valuation studies, there are  
39 some biophysical approaches (Koellner and Geyer, 2013; Coscieme et al., 2014; Mancini et al.,  
40 2018), such as Emergy analysis, Ecological Footprint accounting; and some pluralistic approaches  
41 (Pascual et al., 2017; Martin and Mazzotta, 2018; Folkersen, 2018), such as the pluralistic  
42 valuation approach provided by Intergovernmental Science-Policy Platform on Biodiversity and  
43 Ecosystem Services (IPBES). IPBES considers that the ES (redefined as nature's contributions to  
44 people) and a good quality of life are interdependent, and then processes biophysical, sociocultural,  
45 economic, health and holistic valuations (Pascual et al., 2017) (Figure 1). The approaches of  
46 valuing ES using mixes of monetary and non-monetary units are diverse (Hayha et al., 2015;  
47 Kenter et al., 2016) (Figure 1). In the case provided by Hayha et al. (2015), the ES are assessed in  
48 biophysical and monetary units (Hayha et al., 2015). Kenter et al. (2016) integrate deliberative  
49 monetary valuation, storytelling, subjective wellbeing and psychometric approaches to  
50 comprehensively elicit cultural ecosystem services values (Kenter et al., 2016).

51

52

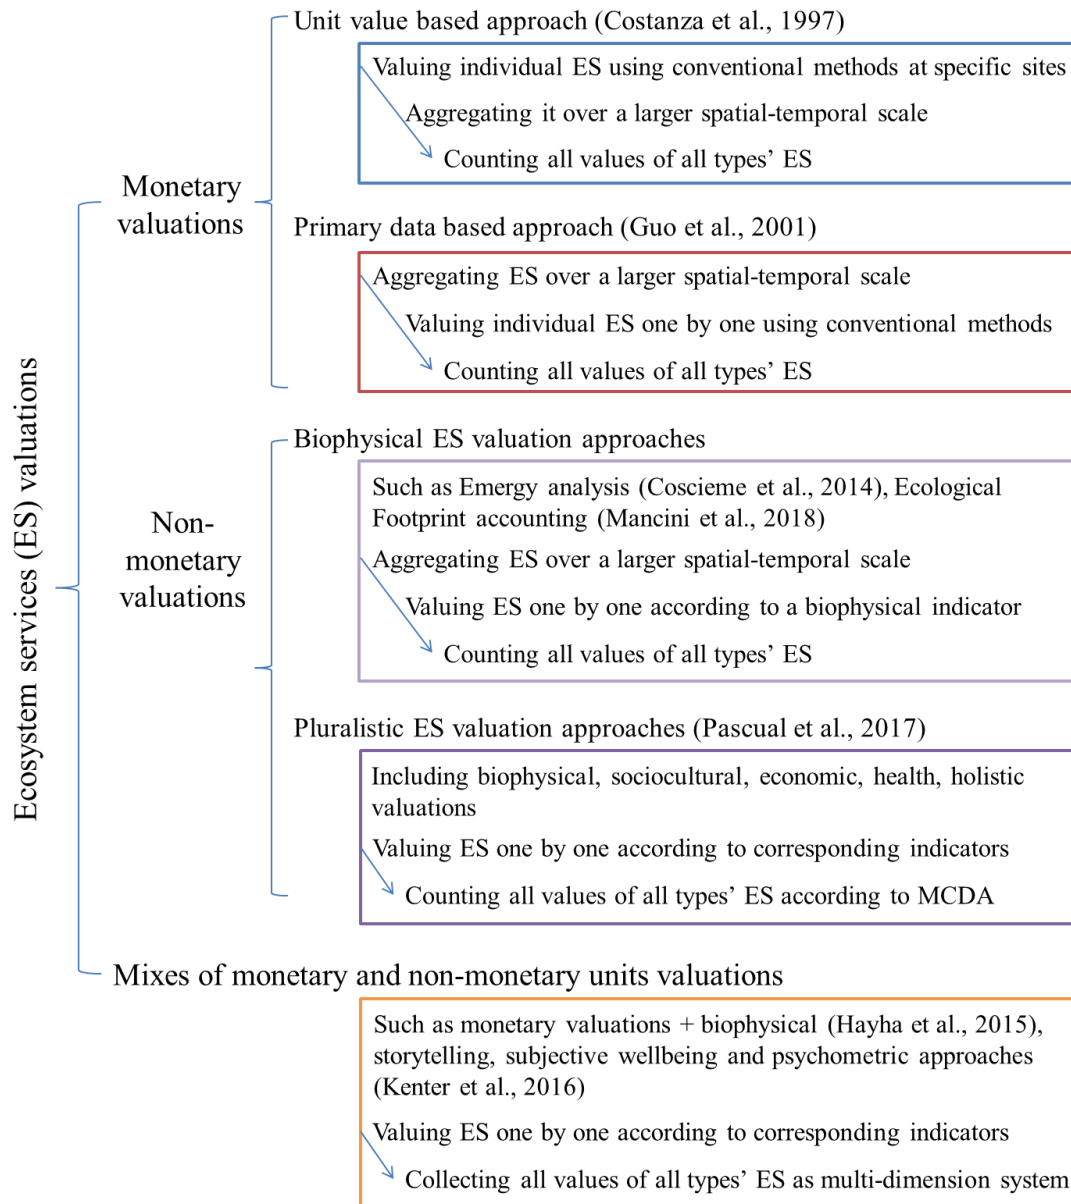

53

54

55

56

Figure 1 Types of ecosystem services valuations

57

58

59

60

61

62

63

64

65

66

There are a series of limitations on current valuation methods. Theoretically, there are two challenges in current valuation methods (Costanza et al., 2017): (1) imperfect information, for example individuals might assign no value on an ES if they do not know the role that the service is playing in their wellbeing (Norton et al., 1998; van Ree et al., 2017); (2) the difficulties of accurately measuring the system's functioning so as to correctly quantify a given service value derived from that system (Boumans et al., 2002; Barbier et al., 2008; Koch et al., 2009). These two challenges lead to two main problems in valuing the overall ES value of a region (or the Earth): the miss-counting or double-counting of ES types, and the underestimate or overestimate of individual ES. And then, according to current aggregation methods, these two problems lead to a more serious underestimate or overestimate on the overall ES value of a region (or the Earth).

67 Practically, there are two difficulties in current valuation methods: (1) most of the current  
68 monetary ES valuation approaches are based on the conventional valuation techniques which are  
69 diverse and limited (Pascual et al., 2010; Folkersen, 2018); (2) most of the current non-monetary  
70 ES valuation approaches use multi-indicators (Pascual et al., 2017; Martin and Mazzotta, 2018),  
71 which make valuation approaches complex and costly. To solve the amplified underestimate or  
72 overestimate on the overall ES value of a region (or the Earth) caused by theoretical challenges  
73 and current aggregation approaches, and to avoid the practical difficulties in valuing ES, we need  
74 to propose a new assessment framework.

75

76 In this work, we firstly proposed a dual value system (DVS), including two new concepts: output  
77 support value (OSV) and optional capacity value (OCV). And then, we presented a case study of  
78 analyzing the OSV and OCV of water provision in Zhujiang River Basin (Pearl River Basin) to  
79 demonstrate the application of DVS. In this case study, to explore the new insights of DVS into  
80 ES and the innovative assessment scheme of DVS, we (1) analyzed the OSV and OCV of water  
81 provision at two spatial scales: river basin scale and sub-basin scale, (2) analyzed the OCV of the  
82 passing-by water among hydrologic units at the sub-basin scale, (3) analyzed the OSV and OCV  
83 variation of the water provision from 2006 to 2015.

84

## 85 **2. Methods and materials**

### 86 **2.1 Methods details: the DVS for valuing ES**

87 Chaisson (2002) has argued that the global value of ES is infinite, as we human beings could not  
88 survive if we lost any vital ES which is indispensable to human being's survival (such as oxygen,  
89 freshwater). The truth indicated by him shows that the total value produced by human being's  
90 economic and social activities (TVPH) relies on each vital ES. Costanza et al. (2014) have  
91 indicated that ecosystems could not provide any values to people without the presence of people  
92 (human capital), their communities (social capital), and their built environment (built capital). In  
93 other words, the value of each ES depends on the level of socioeconomic development. Here we  
94 get two inferences based on these two axioms.

95

96 The first inference is that the consumption of vital ES supports the TVPH. To describe this  
97 inference, we proposed a new concept which is termed as "Output Support Value (OSV)". OSV of  
98 a vital ES refers to the TVPH supported by the ES consumption, which shows the benefits for  
99 human wellbeing derived from consuming a definite volume of ES, directly or indirectly.

100

101 The second inference is that the total volume of a vital ES provides the freedom of consuming  
102 corresponding ES in maintaining the human being's production and survival. To describe this  
103 inference, we proposed a new concept which is termed as "Optional Capacity Value (OCV)".  
104 OCV of a vital ES refers to the optional capacity of supporting the OSV (i.e. TVPH) provided by

105 the total volume of ES, which shows the benefits for human wellbeing derived from having the  
106 option of using, directly or indirectly. OCV is described as the product of multiplying the OSV (i.e.  
107 TVPH) by the freedom of choosing the consumption from the total volume of ES.

108

109 Based on these two inferences and two new concepts, we constructed a brand new assessment  
110 scheme for valuing ES – “dual value system (DVS)”, in which OSV was valued in monetary units  
111 and OCV was valued in non-monetary units.

112

113 For valuing ES, we need first to classify ES in an appropriate way. The classification of ES mainly  
114 has two approaches (Hayha and Franzese, 2014). The first approach is the classification mainly  
115 based on four categories: (1) provisioning, (2) regulating, (3) supporting, and (4) cultural services,  
116 which is the most commonly used classification (Millennium Ecosystem Assessment, 2005; TEEB  
117 Synthesis, 2010; CICES – Haines-Young and Potschin, 2013). And the second approach is the  
118 classification mainly based on spatial characteristics of ES (Costanza, 2008; Fisher et al., 2009).  
119 To satisfy the needs of valuing ES in DVS, we proposed a classification of ES based on  
120 indispensability and spatial characteristics of ES (Table 1) (Figure 2), following the second  
121 approach.

122

123

124 Table 1 Classification of ecosystem services based on indispensability and spatial characteristics,  
125 modified from Hayha and Franzese (2014)

| <b>Classification</b>                | <b>Example</b>                                                                  |
|--------------------------------------|---------------------------------------------------------------------------------|
| Indispensable to human survival      | Basic services for human survive; e.g. fresh water, oxygen                      |
| Indispensable to a definite industry | Basic services for an industry; e.g. honeybee                                   |
| Indispensable to nothing             | Services that human cannot use; e.g. hydrothermal vent ecosystem                |
| Global non-proximal                  | Does not depend on proximity; e.g., carbon sequestration                        |
| Local proximal                       | Depends on proximity; e.g., disturbance regulation                              |
| Directional flow related             | Flow from point of production to point of use; e.g., water supply               |
| In situ                              | Point of use; e.g., soil formation                                              |
| Non-directional flow related         | Flow from point of production to adjacent area of use; e.g., climate regulation |

126

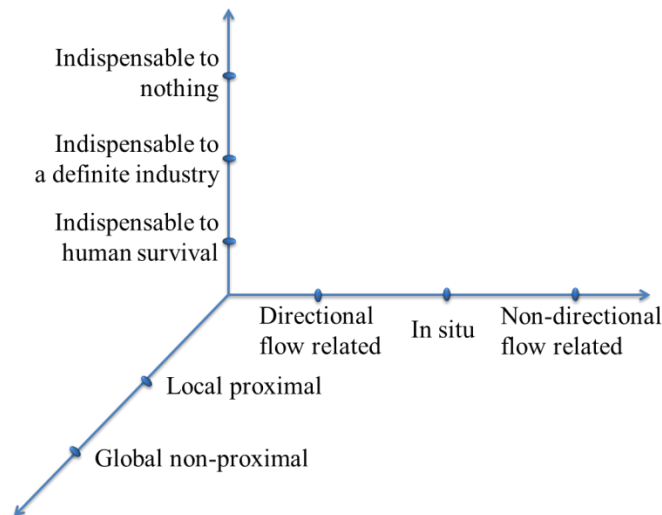

127

128 Figure 2 Three-dimensional schematic diagram for the classification of ecosystem services based  
129 on indispensability and spatial characteristics. For example, oxygen is indispensable to human  
130 survival, global non-proximal, non-directional flow related; fresh water is indispensable to human  
131 survival, local proximal, directional flow related.

132

133

134 In our classification of ES (Figure 2), indispensability means that if we lose any vital ES  
135 (indispensable to human survival, such as oxygen, freshwater), human life would end; if we lose  
136 crucial ES (indispensable to definite industries, such as honeybee), all industries based on this ES  
137 would be vanished. In DVS, we only value the currently usable ES. And an individual ES is  
138 valued only based on current socioeconomic status.

139

140 Regarding the spatial characteristics, there are ES that are not dependent on the specific location  
141 (e.g., global carbon sequestration, global oxygen production), ES that are instead dependent on  
142 their spatial distribution in relation to human presence (e.g., waste treatment and storm protection),  
143 ES in which the direction of the flow from upstream to downstream matters (e.g., water supply  
144 and sediment transport), ES in which the flow without definite direction matters (e.g., fresh air  
145 supply and climate regulation), and ES in which no flow matters (e.g., soil formation).

146

147 Following our classification of ES (Figure 2), OSV of the ES which is indispensable to human  
148 survival could be valued using TVPH; OSV of the ES which is indispensable to definite industries  
149 could be valued using the TVPH based on these industries (Table 2). OCV of an ES is calculated  
150 as the product of multiplying its OSV by the freedom of choosing the ES consumption from the  
151 total volume of ES. The freedom is evaluated by the average uncertainty which could be described  
152 by log base 2 which indicates the uncertainty in a binary decision, and is valued in bits (Ulanowicz,  
153 1986) (Table 2).

154

155

156 Table 2 The Output Support Value (OSV) and Optional Capacity Value (OCV) of an ecosystem  
157 service (ES)

| Ecosystem service (ES)               | Output Support Value (OSV)                   | Optional Capacity Value (OCV)          |
|--------------------------------------|----------------------------------------------|----------------------------------------|
| Indispensable to human survival      | $OSV = TVPH$                                 | $OCV = OSV * \log_2 \frac{ES_t}{ES_c}$ |
| Indispensable to a definite industry | $OSV = TVPH$ based on corresponding industry | $OCV = OSV * \log_2 \frac{ES_t}{ES_c}$ |

158 In the equation,  $ES_t$  denotes the total volume of an ecosystem service in a region;  $ES_c$  denotes  
159 the consumed volume of an ecosystem service in maintaining the production and survival, or in  
160 supporting a definite industry; TVPH denotes the total value produced by human being's economic  
161 and social activities.

162

163

164 Regarding the spatial characteristics, we take regions as the accounting units. In another word,  
165 each accounting unit provides a definite ES value. As the global non-proximal ES supports the  
166 global human activities, it is valued by global TVPH. As the local proximal ES only supports the  
167 local human activities, it is valued by local TVPH. For the ES with (directional or non-directional)  
168 flow, both the local ES in a region and the imported ES come from other regions (accounting units)  
169 support human activities in this region. Following the principle of local priority, the value of  
170 imported ES is assigned as the value that the value of total ES (sum of the local ES and the  
171 imported ES) minus the value of local ES (Eq. 1, 2, 3, 4). For the ES in which no flow matters, its  
172 value is the value of local ES.

173

174

$$175 \quad OSV_l = \begin{cases} TVPH, & ES_c < ES_l \\ TVPH \times \frac{ES_l}{ES_c}, & ES_c \geq ES_l \end{cases} \quad (\text{Eq. 1})$$

$$176 \quad OSV_s = TVPH - OSV_l \quad (\text{Eq. 2})$$

$$177 \quad OCV_l = \begin{cases} TVPH \times \log_2 \frac{ES_l}{ES_c}, & ES_c < ES_l \\ TVPH \times \log_2 \frac{(ES_l + ES_s)}{ES_c} \times \frac{ES_l}{ES_c}, & ES_c \geq ES_l \end{cases} \quad (\text{Eq. 3})$$

$$178 \quad OCV_s = TVPH \times \log_2 \frac{(ES_l + ES_s)}{ES_c} - OCV_l \quad (\text{Eq. 4})$$

179 In the equations,  $OSV_l$  denotes the OSV of local ecosystem service (ES) in a region;  $OSV_s$   
180 denotes the OSV of ES spatial inflow in a region;  $OCV_l$  denotes the OCV of local ES in a region;  
181  $ES_c$  denotes the consumed volume of ES in a region; TVPH denotes the total value produced by  
182 human being's economic and social activities.

183

184

185 In the framework of DVS, all types of ES could be valued parallelly. The overall value of ES in a



186 region (or the Earth) takes the maximum one from the values of all types' ES (Figure 3).  
187  
188

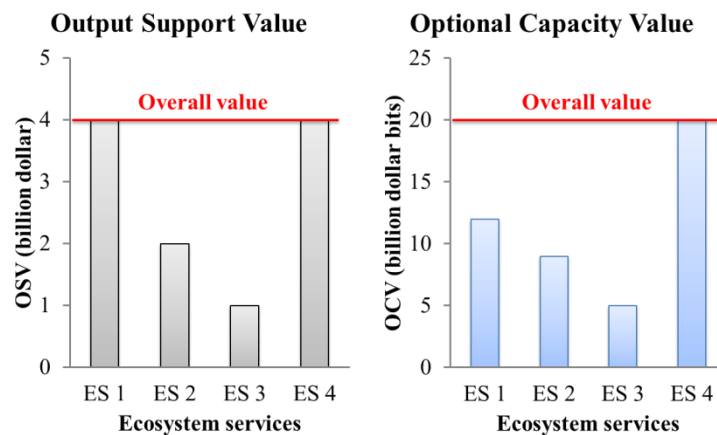

189  
190 Figure 3 Schematic representations of valuing the overall value of multi-types' ecosystem services  
191 (ES). ES 1 represents an ecosystem service which is indispensable to human survival; and ES 4  
192 represents another ecosystem service which is indispensable to human survival; ES 2 represents an  
193 ecosystem service which is indispensable to a definite industry; ES 3 represents another ecosystem  
194 service which is indispensable to another definite industry. The values in these figures are all  
195 fictitious.

196  
197

## 198 2.2 Study area: the Zhujiang River Basin

199 In DVS framework, to value ES, one needs three sets of data with spatial-temporal consistency:  
200 total ES volume, ES consumption and TVPH. Moreover, to discuss the new insights of DVS into  
201 ES value, such as the scale-specificity of DVS in valuing ES and the efficiency of DVS in valuing  
202 the ES fluxes, the case study area should be nested divided and each subdivision has the same data  
203 sets, the data on ES fluxes among subdivisions should be available. The water provision in  
204 Zhujiang River Basin meets these conditions.

205

206 Here, we presented a case study of valuing the water provision in Zhujiang River Basin based on  
207 DVS framework. As water resources are indispensable to human survival and local proximal,  
208 following DVS, we analyze the value of water provision based on total water resources volume,  
209 water consumption and TVPH. Moreover, as water resources are directional flows, we delineate  
210 the donors and recipients of water resources fluxes (passing-by water), and then value each fluxes  
211 based on the volume of passing-by water, water consumption and TVPH of recipients. In Zhujiang  
212 River Basin, the Zhujiang River Water Resources Bulletin (1) provides the total water resources  
213 volume, water consumption and gross domestic product (GDP, here indicates TVPH) of the  
214 overall river basin, (2) divides the Zhujiang River Basin into seven hydrologic units: the  
215 Nanpan-Beipan River, the Hong-Liu River, the Yujiang River, the Xijiang River Lower Reach, the

216 Beijiang River, the Dongjiang River and the Zhujiang Delta (Figure 4), (3) provides the total water  
217 resources volume, water consumption and GDP of each hydrologic units and (4) provides the data  
218 for calculating the volume of passing-by water among hydrologic units, and the water  
219 consumption and GDP of recipients (PRWRC, 2017).

220

221

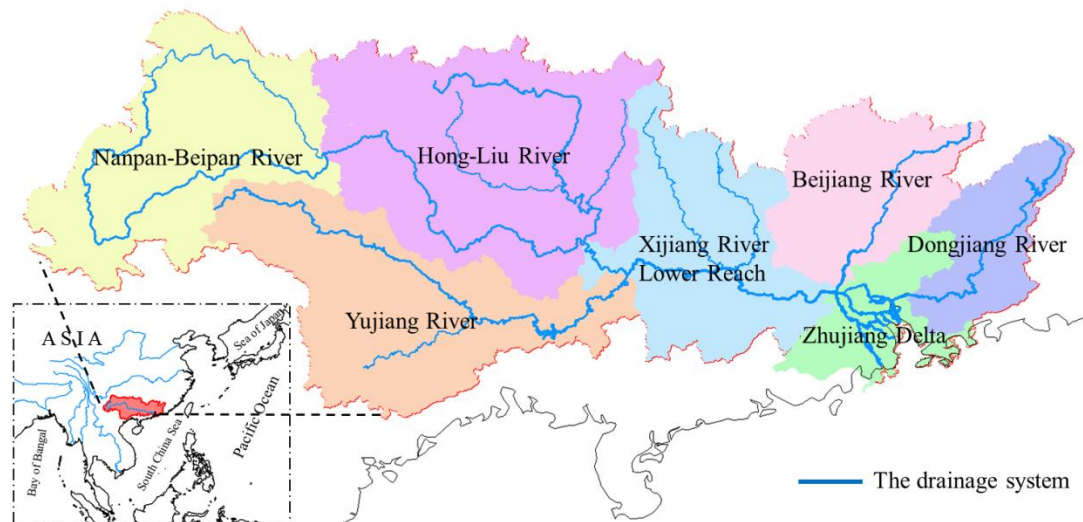

222

223

Figure 4 Zhujiang River Basin (Pearl River Basin) and its seven hydrologic units.

224

225

226 As a case study for demonstrating the application of DVS, in valuing the water provision in  
227 Zhujiang River Basin, we only consider the volume of water resources rather than its environment  
228 and temporal distribution for brevity. All data that we use are available from the Zhujiang River  
229 Water Resources Bulletin provided by the Pearl River Water Resources Commission of the  
230 Ministry of Water Resources (PRWRC) (<http://www.pearlwater.gov.cn/xxcx/szygg/>).

231

### 232 3. Results

#### 233 3.1 The value of the water provision at river basin scale

234 Firstly, we valued the water provision at river basin scale by taking the Zhujiang River Basin as  
235 the accounting unit. In 2015, as the total volume of water resources in Zhujiang River Basin is  
236 410.04 billion  $m^3$  the water usage 60.43 billion  $m^3$  and the GDP 8.5105 trillion yuan (PRWRC, 2017),  
237 the OSV of the water provision in Zhujiang River Basin is 8.5105 trillion yuan which indicates that  
238 the water usage of 60.43 billion  $m^3$  supports the GDP of 8.5105 trillion yuan; the OCV of the water  
239 provision in Zhujiang River Basin is 23.5096 trillion yuan bits which indicates that the total water  
240 provision of 410.04 billion  $m^3$  provides the optional capacity for supporting the TVPH (measured  
241 by GDP) as much as 23.5096 trillion yuan bits (Table 3).

242

243

244 Table 3 The Output Support Value (OSV) and Optional Capacity Value (OCV) of water provision  
 245 provided and experienced by Zhujiang River Basin at river basin scale in 2015

|                         | Total volume<br>(e9 m <sup>3</sup> ) | Usage (e9<br>m <sup>3</sup> ) | GDP (e12<br>yuan) | OSV (e12<br>yuan) | OCV (e12<br>yuan bits) |
|-------------------------|--------------------------------------|-------------------------------|-------------------|-------------------|------------------------|
| Zhujiang<br>River Basin | 410.04                               | 60.43                         | 8.5105            | 8.5105            | 23.5096                |

246

247

### 248 3.2 The value of the water provision at sub-basin scale

249 Secondly, we valued the water provision at sub-basin scale by taking seven major hydrologic units  
 250 of the Zhujiang River Basin as the accounting units. For each hydrologic unit, both the passing-by  
 251 water and the local water yield provide the optional capacity for supporting the TVPH (measured  
 252 by GDP). Following the principle of local priority, in 2015, the Hong-Liu River, Xijiang River  
 253 Lower Reach and Zhujiang Delta respectively receive passing-by water 37.40 billion m<sup>3</sup>, 200.28  
 254 billion m<sup>3</sup> and 360.20 billion m<sup>3</sup> which provide OCV 0.1935 trillion yuan bits, 1.0332 trillion yuan  
 255 bits and 18.7463 trillion yuan bits, respectively (Table 4).

256

257

258 Table 4 The Output Support Value (OSV) and Optional Capacity Value (OCV) of water provision  
 259 experienced by each hydrologic unit of Zhujiang River Basin at sub-basin scale in 2015

|                              | Total volume<br>(e9 m <sup>3</sup> ) | Usage (e9<br>m <sup>3</sup> ) | GDP (e12<br>yuan) | OSV (e12<br>yuan) | OCV (e12<br>yuan bits) |
|------------------------------|--------------------------------------|-------------------------------|-------------------|-------------------|------------------------|
| Nanpan-Beipan River          | 40.00                                | 4.77                          | 0.5817            | 0.5817            | 1.7846                 |
| Hong-Liu River               | 126.37                               | 9.78                          | 0.5175            | 0.5175            | 1.9103                 |
| <b>Passing-by water</b>      | <b>37.40</b>                         |                               |                   |                   | <b>0.1935</b>          |
| Yujiang River                | 44.14                                | 7.86                          | 0.5240            | 0.5240            | 1.3045                 |
| Xijiang River Lower<br>Reach | 79.92                                | 10.79                         | 0.5709            | 0.5709            | 1.6492                 |
| <b>Passing-by water</b>      | <b>200.28</b>                        |                               |                   |                   | <b>1.0332</b>          |
| Beijiang River               | 61.68                                | 5.26                          | 0.3757            | 0.3757            | 1.3344                 |
| Dongjiang River              | 27.40                                | 4.64                          | 0.8436            | 0.8436            | 2.1614                 |
| Zhujiang Delta               | 30.53                                | 17.33                         | 5.0971            | 5.0971            | 4.1641                 |
| <b>Passing-by water</b>      | <b>360.20</b>                        |                               |                   |                   | <b>18.7463</b>         |
| <b>Sum</b>                   | <b>1007.92</b>                       | <b>60.43</b>                  | <b>8.5105</b>     | <b>8.5105</b>     | <b>34.2816</b>         |

260

261

262 Distributing the OCV of the passing-by water into every hydrologic unit which exports water  
 263 resources, we calculated the OCV of the water provision provided by each hydrologic unit,  
 264 including local service and output service (Table 5). The result showed the OCV of the  
 265 point-to-point water provision fluxes (Table 5).

266

267

268 Table 5 The Optional Capacity Value (OCV) of water provision provided by each hydrologic unit

269 of Zhujiang River Basin in 2015

|                           | <i>OSV</i> (e12 yuan bits) |                          |                                     |                          | <b>Sum</b> |
|---------------------------|----------------------------|--------------------------|-------------------------------------|--------------------------|------------|
|                           | Local service              | Output to Hong-Liu River | Output to Xijiang River Lower Reach | Output to Zhujiang Delta |            |
| Nanpan-Beipan River       | 1.7846                     | 0.1935                   | 0.1929                              | 1.9465                   | 4.1176     |
| Hong-Liu River            | 1.9103                     |                          | 0.6311                              | 6.3671                   | 8.9085     |
| Yujiang River             | 1.3045                     |                          | 0.2091                              | 2.1099                   | 3.6235     |
| Xijiang River Lower Reach | 1.6492                     |                          |                                     | 3.8976                   | 5.5468     |
| Beijiang River            | 1.3344                     |                          |                                     | 3.0857                   | 4.4201     |
| Dongjiang River           | 2.1614                     |                          |                                     | 1.3396                   | 3.5010     |
| Zhujiang Delta            | 4.1641                     |                          |                                     |                          | 4.1641     |

270

271

### 272 **3.3 The value variation of the water provision from 2006 to 2015 at sub-basin scale**

273 Thirdly, we compared the *OSV* and *OCV* of the water provision provided by each hydrologic unit  
274 in 2006 and 2015. Results showed that the *OCV* of the water provision of both the local and the  
275 exported services provided by each hydrologic unit increase with the economic growth (Table 6).

276

277

278

279 Table 6 The Output Support Value (OSV) and Optional Capacity Value (OCV) of local and passing-by water provision provided by each hydrologic unit of Zhujiang  
 280 River Basin in 2006 and 2015

|                           | GDP<br>(e12 yuan) |        | Water resources<br>(e9 m <sup>3</sup> ) |        | Water usage<br>(e9 m <sup>3</sup> ) |       | OSV (e12 yuan) |        | OCV (e12 yuan bits) |         |                |         |         |         |
|---------------------------|-------------------|--------|-----------------------------------------|--------|-------------------------------------|-------|----------------|--------|---------------------|---------|----------------|---------|---------|---------|
|                           | 2006              | 2015   | 2006                                    | 2015   | 2006                                | 2015  | 2006           | 2015   | Local service       |         | Output service |         | Sum     |         |
|                           | 2006              | 2015   | 2006                                    | 2015   | 2006                                | 2015  | 2006           | 2015   | 2006                | 2015    | 2006           | 2015    | 2006    | 2015    |
| Nanpan-Beipan River       | 0.1577            | 0.5817 | 29.66                                   | 40.00  | 4.62                                | 4.77  | 0.1577         | 0.5817 | 0.4231              | 1.7846  | 0.6269         | 2.3329  | 1.0500  | 4.1176  |
| Hong-Liu River            | 0.1481            | 0.5175 | 87.35                                   | 126.37 | 10.34                               | 9.78  | 0.1481         | 0.5175 | 0.4560              | 1.9103  | 1.7373         | 6.9982  | 2.1934  | 8.9085  |
| Yujiang River             | 0.1442            | 0.5240 | 36.95                                   | 44.14  | 7.29                                | 7.86  | 0.1442         | 0.5240 | 0.3374              | 1.3045  | 0.6981         | 2.3190  | 1.0355  | 3.6235  |
| Xijiang River Lower Reach | 0.1765            | 0.5709 | 70.74                                   | 79.92  | 11.82                               | 10.79 | 0.1765         | 0.5709 | 0.4555              | 1.6492  | 1.2427         | 3.8976  | 1.6982  | 5.5468  |
| Beijiang River            | 0.1055            | 0.3757 | 64.20                                   | 61.68  | 5.36                                | 5.26  | 0.1055         | 0.3757 | 0.3780              | 1.3344  | 1.1734         | 3.0857  | 1.5514  | 4.4201  |
| Dongjiang River           | 0.2837            | 0.8436 | 38.32                                   | 27.40  | 4.20                                | 4.64  | 0.2837         | 0.8436 | 0.9051              | 2.1614  | 0.6961         | 1.3396  | 1.6011  | 3.5010  |
| Zhujiang Delta            | 1.7566            | 5.0971 | 34.26                                   | 30.53  | 19.50                               | 17.33 | 1.7566         | 5.0971 | 1.4286              | 4.1641  |                |         | 1.4286  | 4.1641  |
| Sum                       | 2.7723            | 8.5105 | 361.49                                  | 410.04 | 63.13                               | 60.43 | 2.7723         | 8.5105 | 4.3836              | 14.3085 | 6.1745         | 19.9731 | 10.5581 | 34.2816 |

281

282

283

## 284 **4. Discussion**

### 285 **4.1 New insights of DVS**

286 DVS provides a new perspective to understand the value of ES. In 2015, in Zhujiang River Basin  
287 at the river basin scale, the OSV of the water provision (8.5105 trillion yuan) means that a definite  
288 volume water usage (60.43 billion m<sup>3</sup>) supports a definite TVPH (8.5105 trillion yuan, measured  
289 by GDP) (Table 3). The OCV of the water provision (23.5096 trillion yuan bits) means that the  
290 volume of total water provision (410.04 billion m<sup>3</sup>) provides the optional capacity for supporting  
291 the TVPH (23.5096 trillion yuan bits, measured by GDP) (Table 3). DVS makes the importance  
292 and value of ES easy be understood through direct value (OSV) and indirect value (OCV) in the  
293 perspective different from traditional exchange value.

294

295 DVS provides new insight into the relationship between the ES value and the social and economic  
296 development (Table 2). From 2006 to 2015, the OSV and OCV of the water provision in seven  
297 accounting units of Zhujiang River Basin increase with their TVPH (here measured by GDP)  
298 (Table 6). This is consistency with the point in previous researches (Costanza et al., 2014).  
299 Conclusively, the social and economic development depends on the ES and the ES value increases  
300 with the social and economic development. Based on this, we would not simply make the social and  
301 economic development against with the ecological conservation.

302

303 DVS provides new insight into how to understand and quantify the value of ES spatial subsidies (i.e.  
304 ES fluxes from one region to another region). The spatial subsidies of ES increase (1) the ES OCV  
305 experienced by the recipient accounting units and (2) the ES OCV provided by the donor  
306 accounting units, and then (3) the social and economic development of recipient accounting units  
307 increase the ES OCV provided by the donor accounting units. In Zhujiang River Basin, according  
308 to the passing-by water, (1) the recipients receive more OCV (Table 4), (2) the donors provide more  
309 OCV (Table 5), and (3) the economic growths in recipients promote the increase of the OCV provided  
310 by donors (Table 6). Based on this framework, we could evaluate the ES value variation in different  
311 scenarios of ecological conservation and natural resources exploitation in a region, and then  
312 optimize the plans for ecological conservation and natural resources exploitation.

313

314 DVS provides a new method to quantify payments for ecosystem services (PES). ES spatial subsidies  
315 provide OCV to recipients (accounting unit), then recipients should provide corresponding ecological  
316 compensation to donors (Yang et al., 2019). The compensation standard could reference to the  
317 OCV of ES spatial subsidies. In 2015, the hydrologic unit of Nanpan-Beipan River provides the  
318 OCV of the water provision 1.7846 trillion yuan bits, 0.1935 trillion yuan bits, 0.1929 trillion yuan  
319 bits, 1.9465 trillion yuan bits to the Nanpan-Beipan River, Hong-Liu River, Xijiang River Lower  
320 Reach and Zhujiang Delta respectively (Table 5). Then, if a water resources protection program in  
321 Nanpan-Beipan River costs 4.1176 billion yuan, the Nanpan-Beipan River, Hong-Liu River, Xijiang

322 River Lower Reach and Zhujiang Delta should pay 1.7846 billion yuan, 0.1935 billion yuan, 0.1929  
323 billion yuan, 1.9465 billion yuan respectively.

324

325 DVS provides a new framework for ES management. Following DVS, one could (1) identify the  
326 features of an individual ES, (2) identify the accounting units appropriately, (3) collect  
327 corresponding data sets, and then (4) calculate the OSV and OCV of this ES (Table 2). Based on  
328 the ES OCV, one could discuss the ES management in each region and the PES among regions  
329 (Yang et al., 2019). If one values a set of ES in a region with limited space and resources, one  
330 could estimate the overall ES value in this region following DVS (Figure 3), and then discriminate  
331 between different services to decide what should be managed and what should be traded to satisfy  
332 human needs/ wants for human wellbeing. In this case study, we valued the water provision in  
333 Zhujiang River Basin using the total water provision volumes, water consumptions and TVPH  
334 (indicated by GDP) at basin scale and sub-basin scale respectively. This method could be used in  
335 any other river basins and regions.

336

337 In DVS, there are intrinsic consistency among the OSV at different scales and intrinsic  
338 incommensurability among the OCV at different scales. OSV of an ES means the TVPH supported  
339 by the consumed ES, and the TVPH and consumed ES in a certain space-time condition are  
340 constant, which is independent of spatial and temporal scales, so OSV are intrinsically consistent  
341 at different scales. In contrast, OCV of an ES means the optional capacity of supporting the TVPH  
342 provided by the total ES, and the spatial subsidies of an ES among accounting units increase the  
343 total volume of ES in every accounting unit, their OCV are intrinsically incommensurable at  
344 different scales. Moreover, the spatial distributions of the TVPH, ES and ES consumption are  
345 mismatched, and OCV of an ES is calculated by these three indicators non-linearly (Table 2), so  
346 their OCV (even only considering the local services) are intrinsically incommensurable at different  
347 scales.

348

#### 349 **4.2 Advantages of DVS**

350 DVS provides a simple and general assessment scheme for valuing ES. Firstly, DVS avoids the  
351 practical difficulties in traditional ES valuation approaches, such as the difficulty of re-estimating  
352 a large amount of unit values and the difficulty of accurately valuing each individual ES. Secondly,  
353 the misestimate of ES value in DVS is traceable and easy-to-correct, although DVS does not  
354 completely avoid the underestimate or overestimate on individual ES led by insufficient  
355 information and misunderstanding on an ES. Thirdly, DVS provides a general approach and a  
356 general unit to value ES, avoids the difficulties for transforming and aggregating  
357 incommensurable data which come from the values of different type's ES. Fourthly, DVS avoids  
358 the amplification of underestimate or overestimate on the overall ES value of a region (or the  
359 Earth), although DVS do not completely avoid the miss-counting or double-counting of ES types

360 led by insufficient information.

361

362 DVS avoids the practical difficulties in traditional ES valuation approaches. The value of ES  
363 depends on the level of socioeconomic development (Costanza et al., 2014). So, following the unit  
364 value based approach, one should value the 2011 ES using the 2011 unit values (Costanza et al.,  
365 2014), value the 2050 ES using the 2050 unit values (Kubiszewski et al., 2017), rather than value  
366 the 2011 ES using the 1997 unit values (Costanza et al., 2014), value the 2050 ES using the 2011  
367 unit values (Kubiszewski et al., 2017). However, re-estimating all unit values is a heavy work,  
368 especially, considering the non-linearity in ecosystem services (Barbier et al., 2008; Koch et al.,  
369 2009) and the spatial heterogeneity of unit values (de Groot et al., 2012; Crossman et al., 2013;  
370 Drakou et al., 2015). In the primary data based approach, the difficulty for accurately valuing each  
371 individual ES is remained (Guo et al., 2001; Dai et al., 2016), although there are some technique  
372 innovations in recent years (Coscieme et al., 2014). In DVS, the OSV of an ES is determined by  
373 the TVPH and ES consumption; the OCV of an ES is determined by total ES volume, ES  
374 consumption and OSV (Table 2). In this case study, the TVPH was indicated by GDP which is the  
375 only indicator of indicating the TVPH in all current social and economic indexes. If someone gets  
376 another indicator which could indicate the TVPH more accurately, he could use that indicator to  
377 replace GDP in his study. This replacement has no impact on the assessment scheme of DVS. In  
378 this work, the freedom was evaluated by the average uncertainty of selecting ES consumption  
379 from the total volume of this ES. The average uncertainty was described by log base 2 which  
380 indicated the uncertainty in a binary decision (Ulanowicz, 1986). If someone believes that another  
381 indicator could indicate the average uncertainty more appropriately, he could use that one to  
382 replace log base 2 in his study. This replacement does not change the assessment scheme of DVS.  
383 So, DVS reflects the level of economic development and avoids the difficulties in unit value based  
384 approach and primary data based approach.

385

386 DVS makes the misestimate of ES value traceable and easy-to-correct. In traditional approaches,  
387 such as direct market valuation methods, revealed preference methods and stated preference  
388 methods, the valuation of different types of ES depends on different rules and their underestimate  
389 and overestimate are difficult to identify and correct (Pascual et al., 2010). The ES valuation  
390 method in DVS (Table 2) makes the underestimate or overestimates of individual ES value to be  
391 traceable and easy-to-correct, although DVS does not completely avoid the underestimate or  
392 overestimate on individual ES led by insufficient information and misunderstanding on an ES.

393

394 DVS provides a general approach and a general unit to value ES. There is a great difficulty in  
395 aggregating the non-monetary values of ES because the non-monetary ES values could be  
396 qualitative or quantitative, and are valued by diverse units/ indicators for different ES. For  
397 resolving this problem, someone tries the Multi-Criteria Decision Analysis (MCDA) so as to



398 transform the incommensurable data (i.e., monetary and non-monetary values) into non-monetary,  
399 dimensionless values, and then to mathematically incorporate non-monetary features into the  
400 aggregation (Martin and Mazzotta, 2018). However, one needs to provide some assumptions if he/  
401 she wants to transform a set of incommensurable data and aggregate them. Different researchers  
402 provide different assumptions, and their aggregating results are sensitive to their assumptions  
403 (Martin and Mazzotta, 2018). Moreover, the transforming and aggregating approaches are very  
404 complex. In DVS, we calculate the OCV of all types' ES using a general approach and a general  
405 unit. So, DVS avoids the difficulties for transforming and aggregating incommensurable data  
406 which come from the values of different type's ES.

407

408 DVS avoids the amplification of underestimate or overestimate on the overall ES value of a region  
409 (or the Earth). The common problem of valuing the total economic value of ES in a region (or the  
410 Earth) in both the unit value based approach and the primary data based approach is the amplified  
411 underestimate or overestimate caused by the miss-counting or double-counting of ES types (Fu et  
412 al., 2011; Stoeckl et al., 2014; van Ree et al., 2017), as their aggregating approaches are counting  
413 each value of all types' ES (Costanza et al., 2014; Dai et al., 2016) (Figure 5). Stoeckl et al. (2014)  
414 try to consider the complexity and non-linearity of ecosystems and use statistical techniques to  
415 identify and control their overlapping benefits, but their methods and estimates still have some  
416 limitations. In DVS, the total value of ES in a region (or the Earth) takes the maximum one from  
417 the values of all types' ES (Figure 3, 5). So, the severities of underestimate or overestimate on the  
418 overall ES value in a region (or the Earth) led by miss-counting or double-counting of ES types in  
419 ES valuation would be relieved in DVS, although DVS do not completely avoid the miss-counting  
420 or double-counting of ES types led by insufficient information (Figure 5).

421

422

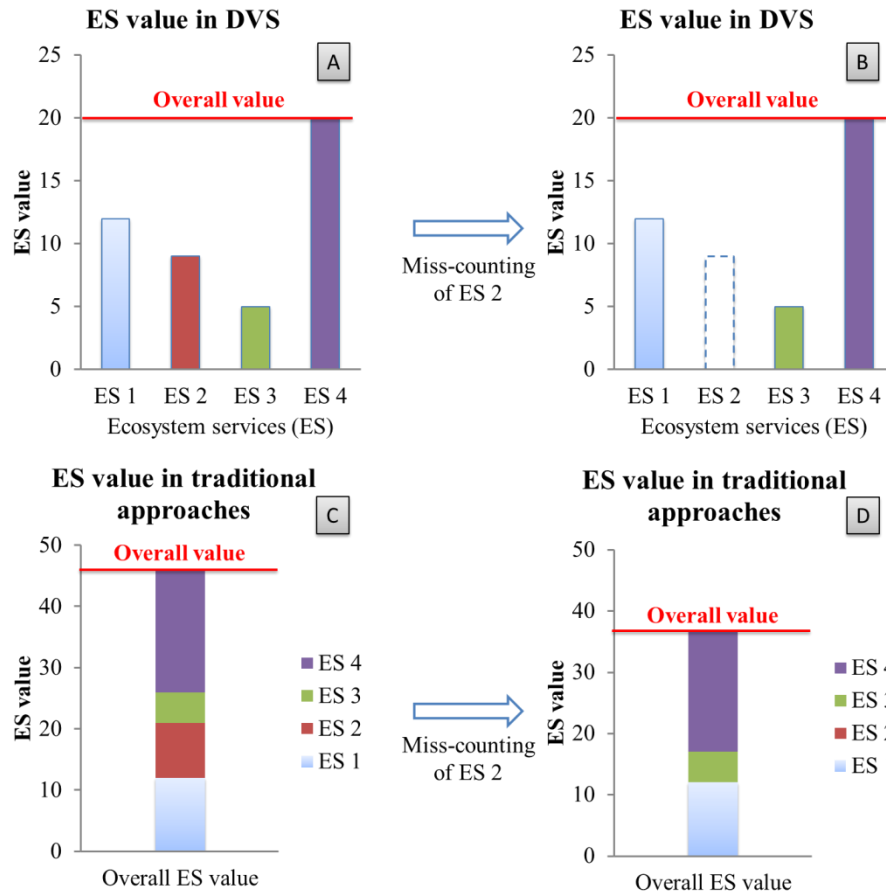

423

424

425

426

427

428

429

430

## 431 5. Conclusions

432 In this paper, we proposed a dual value system (DVS), a new assessment scheme to value ES.

433 DVS includes two types of ES value: (1) Output Support Value (OSV) means the TVPH supported

434 by the consumed ES, and (2) Optional Capacity Value (OCV) means the optional capacity of

435 supporting the TVPH provided by the total ES. The overall value of ES in a region (or the Earth)

436 takes the maximum one from the values of all types' ES.

437

438 DVS provides new insight to understand and value ES:

439 (1) DVS makes the importance and value of ES easy be understood in new perspective;

440 (2) DVS concisely shows the relationship between ES value and the social and economic

441 development;

442 (3) DVS provides a tool for a new PES approach;

443 (4) DVS provides a new framework for ES management;

444 (5) DVS has the scale-specificity.

445

446 DVS overcomes the limitations on current ES valuation approaches:

447 (1) DVS avoids the practical difficulties in traditional ES valuation approaches;

448 (2) DVS makes the misestimate of ES value traceable and easy-to-correct;

449 (3) DVS provides a general approach and a general unit to value ES;

450 (4) DVS avoids the amplification of underestimate or overestimate on the overall ES value of

451 a region.

452

453 DVS provides a useful quantifying framework for coordinating ecological protection and  
454 ecological compensation.

455

## 456 **Acknowledgments**

457 We thank Li Yongchi, Li Zhaolei, Yang Yuanyuan and Zhao Bin for grateful assistance that helps  
458 to improve the manuscript. This research has not received any specific grant from funding  
459 agencies in the public, commercial, or not-for-profit sectors.

460

## 461 **References**

- 462 Barbier E B, Koch E W, Silliman B R, Hacker S D, Wolanski E, Primavera J, Granek E F, Polasky S,  
463 Aswani S, Cramer L A, Stoms D M, Kennedy C J, Bael D, Kappel C V, Perillo G M E, Reed D J.  
464 2008. Coastal ecosystem-based management with nonlinear ecological functions and values.  
465 *Science*, 319: 321-323 <https://doi.org/10.1126/science.1150349>
- 466 Boumans R, Costanza R, Farley J, Wilson M A, Portela R, Rotmans J, Villa F, Grasso M. 2002.  
467 Modeling the dynamics of the integrated earth system and the value of global ecosystem services  
468 using the GUMBO model. *Ecol Econ*, 41: 529-560 [https://doi.org/10.1016/S0921-8009\(02\)00098-8](https://doi.org/10.1016/S0921-8009(02)00098-8)
- 469 Chaisson E. 2002. *Cosmic Evolution: The Rise of Complexity in Nature*. Cambridge, Mass.: Harvard  
470 University Press
- 471 Coscieme L, Pulselli F M, Marchettini N, Sutton P C, Anderson S, Sweeney S. 2014. Emergy and  
472 ecosystem services: A national biogeographical assessment. *Ecosyst Serv*, 7: 152-159  
473 <https://doi.org/10.1016/j.ecoser.2013.11.003>
- 474 Costanza R. 2008. Ecosystem services: Multiple classification systems are needed. *Biol Conserv*, 141:  
475 350-352 <https://doi.org/10.1016/j.biocon.2007.12.020>
- 476 Costanza R, D'Arge R, DeGroot R, Farber S, Grasso M, Hannon B, Limburg K, Naeem S, O'Neill R V,  
477 Paruelo J, Raskin R G, Sutton P, VandenBelt M. 1997. The value of the world's ecosystem services  
478 and natural capital. *Nature*, 387: 253-260 <https://doi.org/10.1038/387253a0>
- 479 Costanza R, de Groot R, Sutton P, van der Ploeg S, Anderson S J, Kubiszewski I, Farber S, Turner R K.  
480 2014. Changes in the global value of ecosystem services. *Global Environ Chang*, 26:152-158

- 481 <https://doi.org/10.1016/j.gloenvcha.2014.04.002>
- 482 Costanza R, Groot R D, Braat L, Kubiszewski I, Fioramonti L, Sutton P, Farber S, Grasso M. 2017.
- 483 Twenty years of ecosystem services: How far have we come and how far do we still need to go?
- 484 *Ecosyst Serv*, 28: 1-16 <https://doi.org/10.1016/j.ecoser.2017.09.008>
- 485 Crossman N D, Burkhard B, Nedkov S, Willemen L, Petz K, Palomo I, Drakou E G, Martin-Lopez B,
- 486 McPhearson T, Boyanova K, Alkemade R, Egoh B, Dunbar M B, Maes J. 2013. A blueprint for
- 487 mapping and modelling ecosystem services. *Ecosyst Serv*, 4: 4-14
- 488 <https://doi.org/10.1016/j.ecoser.2013.02.001>
- 489 Dai Z, Puyang X, Han L. 2016. Using assessment of net ecosystem services to promote sustainability
- 490 of golf course in China. *Ecol Indic*, 63: 165-171 <https://doi.org/10.1016/j.ecolind.2015.11.056>
- 491 de Groot R, Brander L, van der Ploeg S, Costanza R, Bernard F, Braat L, Christie M, Crossman N,
- 492 Ghermandi A, Hein L, Hussain S, Kumar P, McVittie A, Portela R, Rodriguez L C, Ten Brink P,
- 493 van Beukeringh P. 2012. Global estimates of the value of ecosystems and their services in monetary
- 494 units. *Ecosyst Serv*, 1: 50-61 <https://doi.org/10.1016/j.ecoser.2012.07.005>
- 495 Drakou E G, Crossman N D, Willemen L, Burkhard B, Palomo I, Maes J, Peedell S. 2015. A
- 496 visualization and data-sharing tool for ecosystem service maps: Lessons learnt, challenges and the
- 497 way forward. *Ecosyst Serv*, 13: 134-140 <https://doi.org/10.1016/j.ecoser.2014.12.002>
- 498 Farley J, Costanza R. 2010. Payments for ecosystem services: From local to global. *Ecol Econ*, 69:
- 499 2060-2068 <https://doi.org/10.1016/j.ecolecon.2010.06.010>
- 500 Fisher, B., Turner, R.K. and Morling, P., 2009. Defining and classifying ecosystem services for
- 501 decision making. *ECOL ECON*, 68:643-653. <https://doi.org/10.1016/j.ecolecon.2008.09.014>
- 502 Fisher B, Turner R K, Morling P. 2009. Defining and classifying ecosystem services for decision
- 503 making. *Ecol Econ*, 68: 643-653 <https://doi.org/10.1016/j.ecoser.2017.11.008>
- 504 Fu B, Su C, Wei Y, Willett I R, Lue Y, Liu G. 2011. Double counting in ecosystem services valuation:
- 505 causes and countermeasures. *Ecol Res*, 26: 1-14 <https://doi.org/10.1007/s11284-010-0766-3>
- 506 Guo Z W, Xiao X M, Gan Y L, Zheng Y J. 2001. Ecosystem functions, services and their values - a
- 507 case study in Xingshan County of China. *Ecol Econ*, 38: 141-154
- 508 [https://doi.org/10.1016/S0921-8009\(01\)00154-9](https://doi.org/10.1016/S0921-8009(01)00154-9)
- 509 Haines-Young R, Potschin M. 2013. Common International Classification of Ecosystem Services
- 510 (CICES): Consultation on Version 4, August-December 2012. EEA Framework Contract No
- 511 EEA/IEA/09/003. <http://www.cices.eu> or <http://www.nottingham.ac.uk/cem>.
- 512 Hayha T, Franzese P P. 2014. Ecosystem services assessment: A review under an ecological-economic
- 513 and systems perspective. *Ecol Model*, 289: 124-132
- 514 <https://doi.org/10.1016/j.ecolmodel.2014.07.002>
- 515 Hayha T, Franzese P P, Paletto A, Fath B D. 2015. Assessing, valuing, and mapping ecosystem
- 516 services in Alpine forests. *Ecosyst Serv*, 14: 12-23 <https://doi.org/10.1016/j.ecoser.2015.03.001>
- 517 Jiang W. 2017. Ecosystem services research in China: A critical review. *Ecosyst Serv*, 26: 10-16
- 518 <https://doi.org/10.1016/j.ecoser.2017.05.012>
- 519 Kenter J O, Jobstvot N, Watson V, Irvine K N, Christie M, Bryce R. 2016. The impact of information,
- 520 value-deliberation and group-based decision-making on values for ecosystem services: Integrating

- 521 deliberative monetary valuation and storytelling. *Ecosyst Serv*, 21: 270-290  
522 <https://doi.org/10.1016/j.ecoser.2016.06.006>
- 523 Koch E W, Barbier E B, Silliman B R, Reed D J, Perillo G M E, Hacker S D, Granek E F, Primavera J  
524 H, Muthiga N, Polasky S, Halpern B S, Kennedy C J, Kappel C V, Wolanski E. 2009. Non-linearity  
525 in ecosystem services: temporal and spatial variability in coastal protection. *Front Ecol Environ*, 7:  
526 29-37 <https://doi.org/10.1890/080126>
- 527 Koellner T, Geyer R. 2013. Global land use impact assessment on biodiversity and ecosystem services  
528 in LCA. *Int J Life Cycle Ass*, 18: 1185-1187 <https://doi.org/10.1007/s11367-013-0580-6>
- 529 Kubiszewski I, Costanza R, Anderson S, Sutton P. 2017. The future value of ecosystem services:  
530 Global scenarios and national implications. *Ecosyst Serv*, 26: 289-301  
531 <https://doi.org/10.1016/j.ecoser.2017.05.004>
- 532 Mancini M S, Galli A, Coscieme L, Niccolucci V, Lin D, Pulselli F M, Bastianoni S, Marchettini N.  
533 2018. Exploring ecosystem services assessment through Ecological Footprint accounting. *Ecosyst*  
534 *Serv*, 30: 228-235 <https://doi.org/10.1016/j.ecoser.2018.01.010>
- 535 Martin D M, Mazzotta M. 2018. Non-monetary valuation using Multi-Criteria Decision Analysis:  
536 Sensitivity of additive aggregation methods to scaling and compensation assumptions. *Ecosyst Serv*,  
537 29: 13-22 <https://doi.org/10.1016/j.ecoser.2017.10.022>
- 538 Millennium Ecosystem Assessment. 2005. *Ecosystems and Human Well-Being: Synthesis*. Washington,  
539 DC: Island Press
- 540 Norton B, Costanza R, Bishop R C. 1998. The Evolution of Preferences: Why 'Sovereign' Preferences  
541 May Not Lead to Sustainable Policies and What to Do about It. *Ecol Econ*, 24: 193-211  
542 [https://doi.org/10.1016/S0921-8009\(97\)00143-2](https://doi.org/10.1016/S0921-8009(97)00143-2)
- 543 Ouyang Z, Wang X, Miao H. 1999. A primary study on Chinese terrestrial ecosystem services and their  
544 ecological-economic values (in Chinese). *Acta Ecol Sin* 19: 607-613  
545 [http://www.ecologica.cn/stxb/ch/reader/view\\_abstract.aspx?file\\_no=990504&flag=1](http://www.ecologica.cn/stxb/ch/reader/view_abstract.aspx?file_no=990504&flag=1)
- 546 Pascual U, Balvanera P, D'áz S, Pataki G R, Roth E, Stenseke M, Watson R T, Ba Ak Dessane E, Islar  
547 M, Kelemen E, Maris V, Quaas M, Subramanian S M, Wittmer H, Adlan A, Ahn S, Al-Hafedh Y S,  
548 Amankwah E, Asah S T, Berry P, Bilgin A, Breslow S J, Bullock C, Cáceres D, Daly-Hassen H,  
549 Figueroa E, Golden C D, Gómez-Baggethun E, González-Jiménez D, Houdet J L, Keune H, Kumar  
550 R, Ma K, May P H, Mead A, O Farrell P, Pandit R, Pengue W, Pichis-Madruga R, Popa F, Preston  
551 S, Pacheco-Balanza D, Saarikoski H, Strassburg B B, van den Belt M, Verma M, Wickson F, Yagi  
552 N. 2017. Valuing nature's contributions to people: the IPBES approach. *Curr Opin Env Sust*, 26-27:  
553 7-16 <https://doi.org/10.1016/j.cosust.2016.12.006>
- 554 Pascual U, Muradian R, Brander L, Gómez-Baggethun E, Martín-López B, Verma M, Armsworth P,  
555 Christie M, Cornelissen H, Eppink F. 2010. The economics of valuing ecosystem services and  
556 biodiversity. In: TEEB Ecological and Economic Foundation. 2010. *The Economics of Ecosystems*  
557 *and Biodiversity: The Ecological and Economic Foundations*. London/ Washington: Earthscan
- 558 PRWRC: Pearl River Water Resources Commission of the Ministry of Water Resources. 2017.  
559 Zhujiang River Water Resources Bulletin 2015 (in Chinese). Guangzhou: Pearl River Water  
560 Resources Commission of the Ministry of Water Resources

- 561 <http://www.pearlwater.gov.cn/xxcx/szygg/>
- 562 SCPRC: State Council of the People's Republic of China. 2014. The State Council approved the
- 563 Development Planning of Zhujiang-Xijiang Economic Zone (in Chinese). Beijing: State Council
- 564 of the People's Republic of China
- 565 [http://www.gov.cn/zhengce/content/2014-07/16/content\\_8933.htm](http://www.gov.cn/zhengce/content/2014-07/16/content_8933.htm)
- 566 Stoeckl N, Farr M, Larson S, Adams V M, Kubiszewski I, Esparon M, Costanza R. 2014. A new
- 567 approach to the problem of overlapping values: A case study in Australia's Great Barrier Reef.
- 568 *Ecosyst Serv*, 10: 61-78 <https://doi.org/10.1016/j.ecoser.2014.09.005>
- 569 TEEB Synthesis. 2010. Mainstreaming the Economics of Nature: a Synthesis of the Approach,
- 570 Conclusions and Recommendations of TEEB. London/ Washington: Earthscan
- 571 Ulanowicz R E. 1986. Growth and Development: Ecosystems Phenomenology. New York:
- 572 Springer-Verlag
- 573 van Ree C C D F, van Beukering P J H, Boekstijn J. 2017. Geosystem services: A hidden link in
- 574 ecosystem management. *Ecosyst Serv*, 26: 58-69 <https://doi.org/10.1016/j.ecoser.2017.05.013>
- 575 Yang H, Zhao B, Chen J. 2019. Quantifying the Payments for Ecosystem Services among hydrologic
- 576 units in Zhujiang River Basin, China based on the indicator of Optional Capacity Value. bioRxiv:
- 577 616680 <https://doi.org/10.1101/616680>
- 578
